# Supplementary material
Source: publisher figshare collection journal article supplement (https://tandf.figshare.com/articles/dataset/_/1569266)

**Figure S1**

**A**

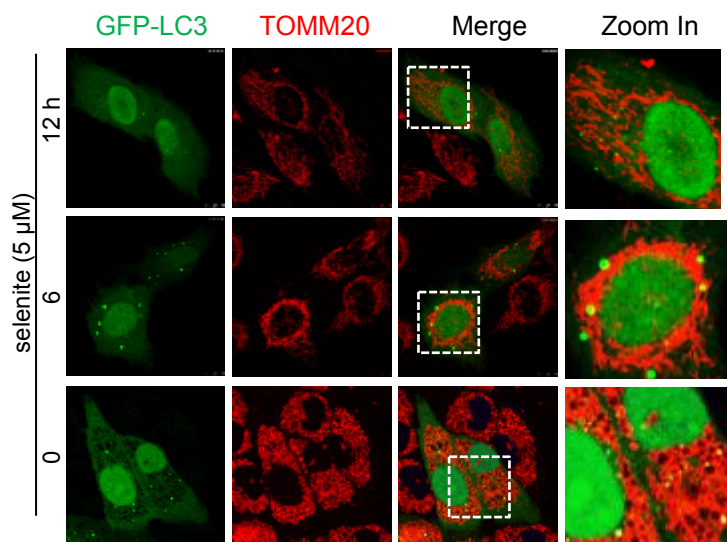

**B**

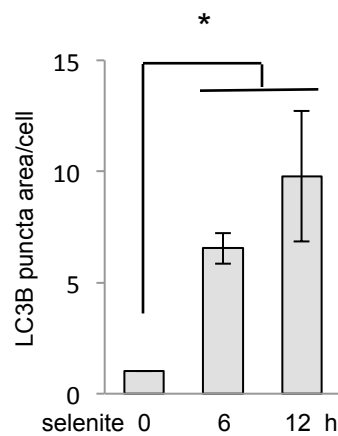

**C**

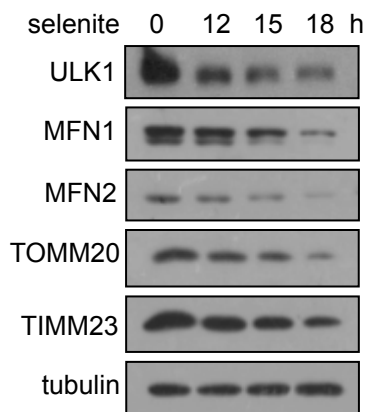

**D**

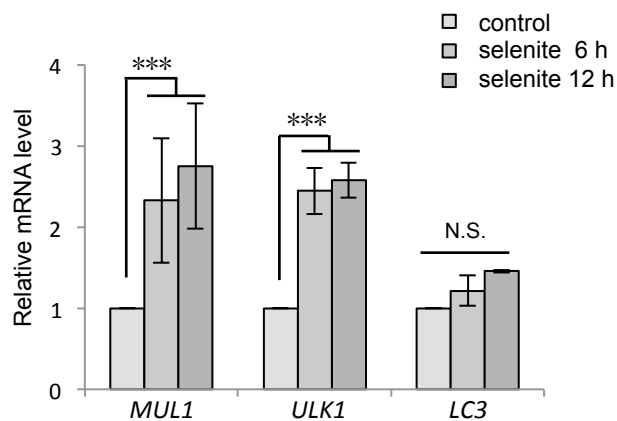

**E**

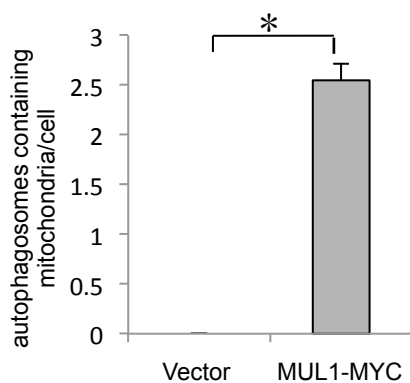

**Figure S2**

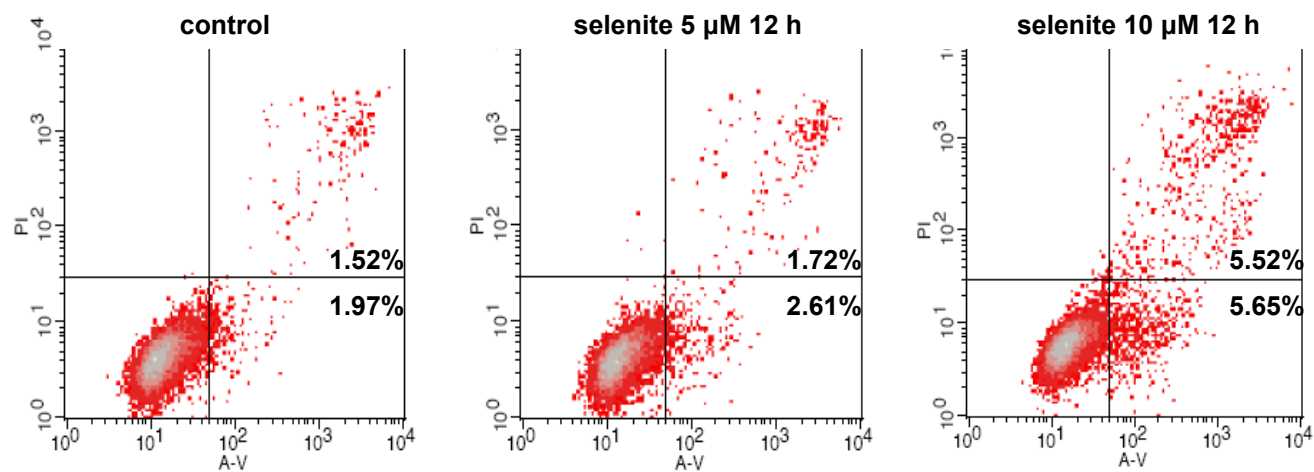

**Figure S3**

**A**

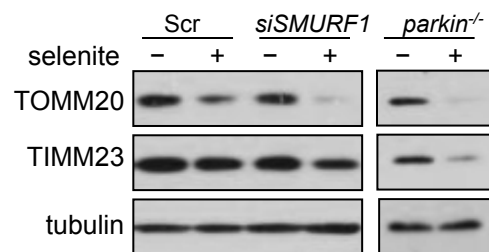

**B**

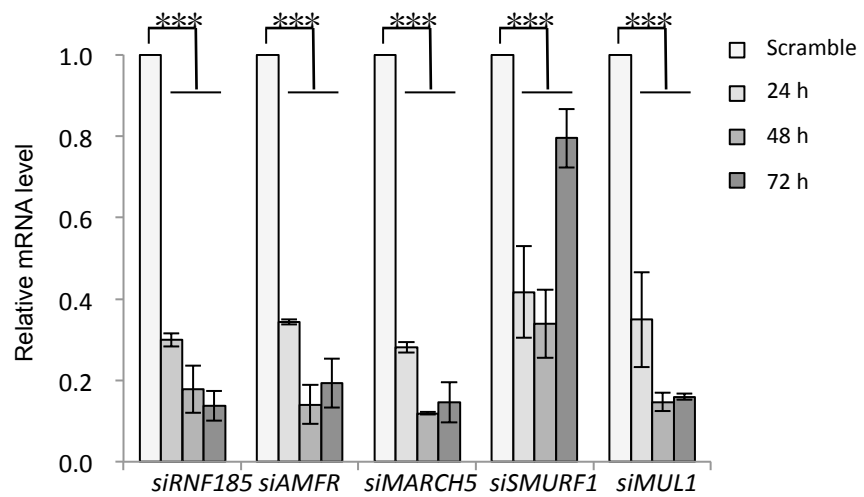

**Figure S4**

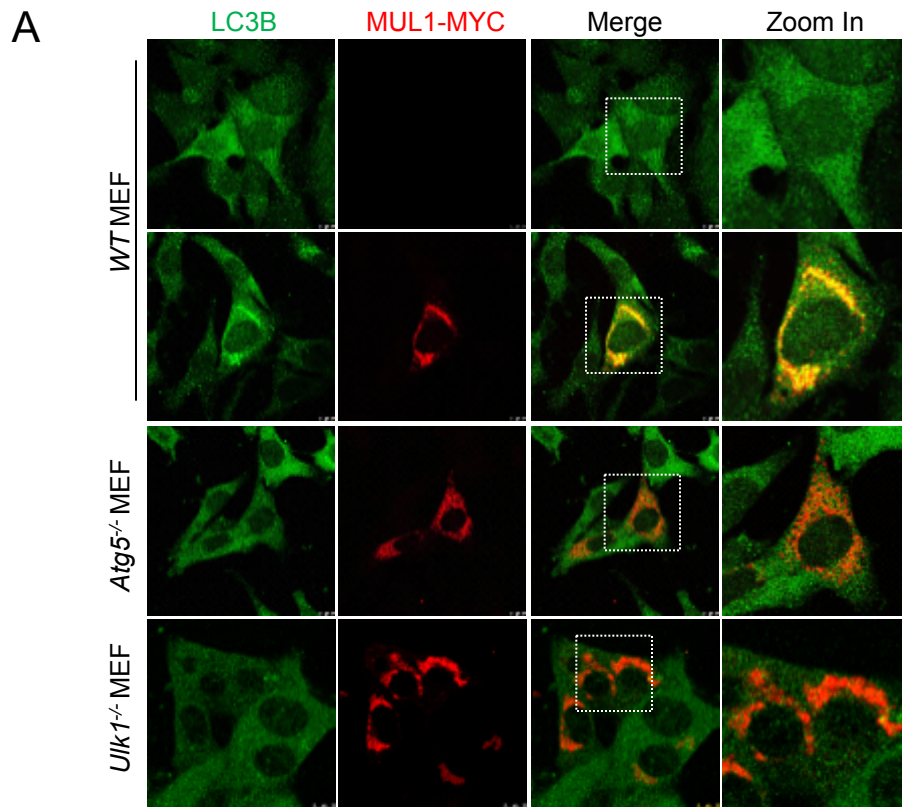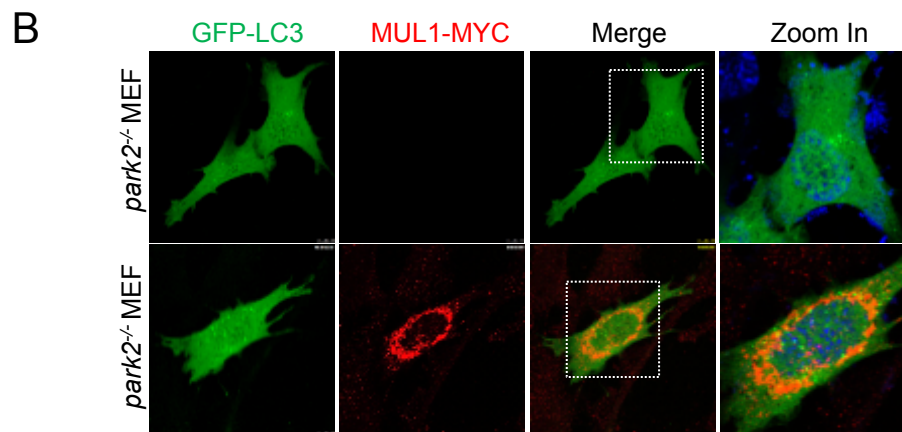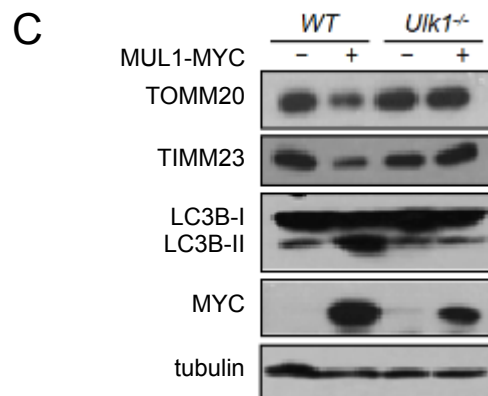

**Figure S5**

**A**

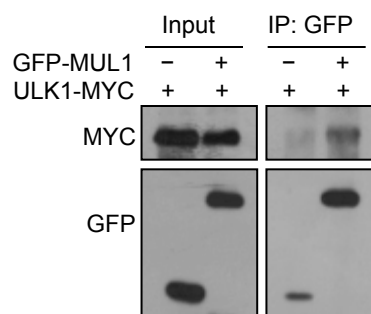

**B**

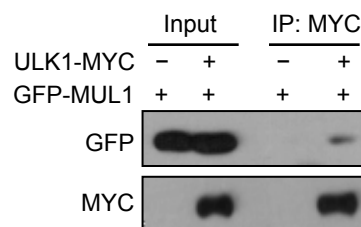

**C**

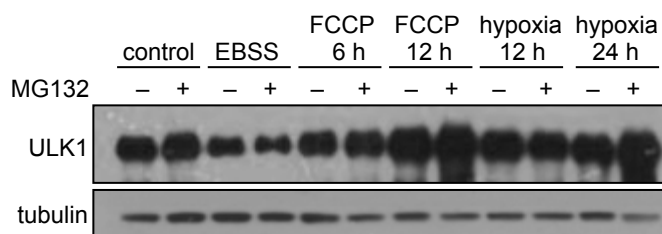

**Figure S6**

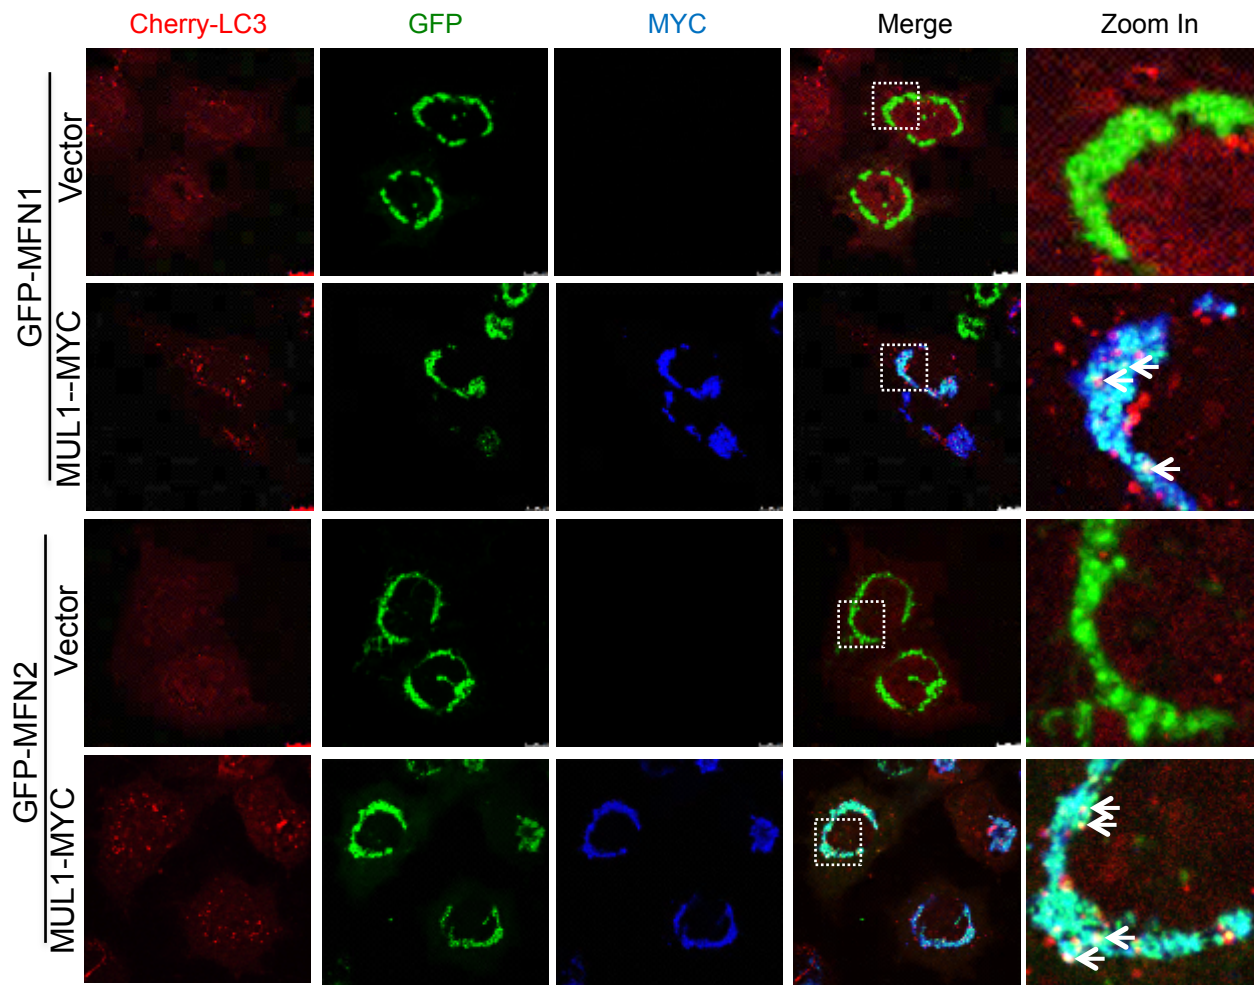

**Figure S7**

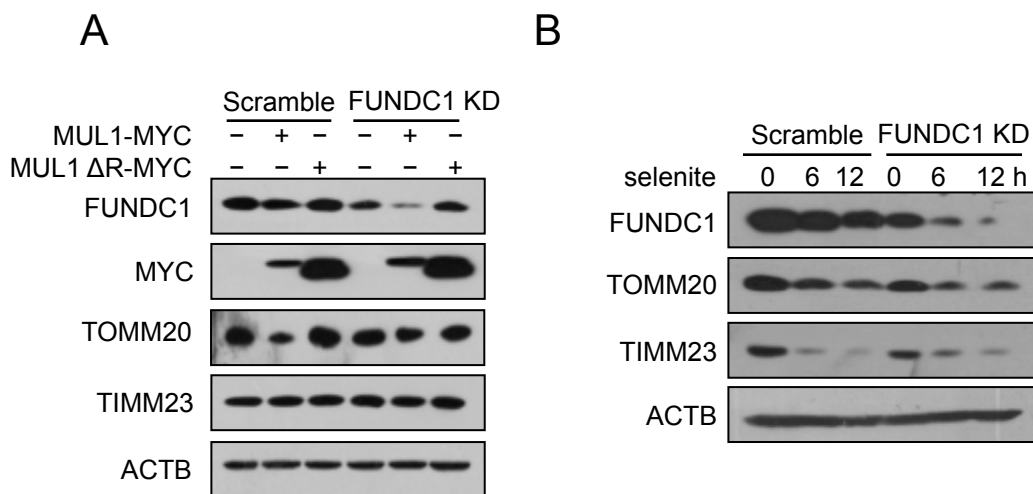

**Figure S8**

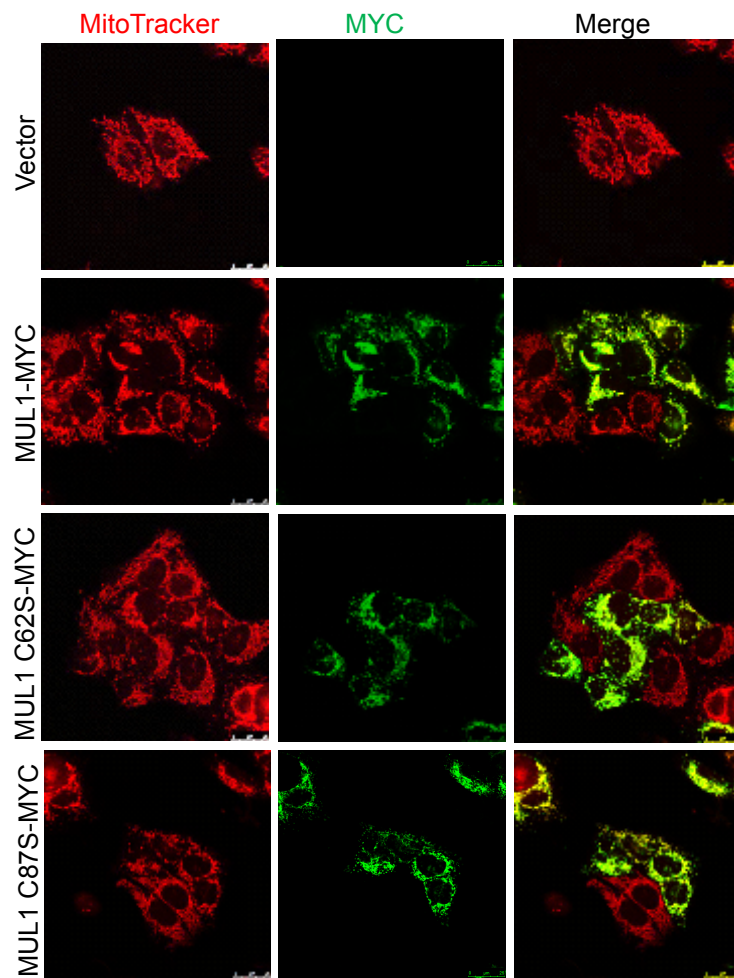

Supplement: Supplementary file 1 [file 2]
